# Supplementary material for: Non-muscle myosin IIB is critical for nuclear translocation during 3D invasion
Source: PubMed Central journal article supplement — J Cell Biol. 2015 Aug 17;210(4):583–94. doi: 10.1083/jcb.201502039 (PMC4539979; doi:10.1083/jcb.201502039), 2015-08-17
Supplement: supp_jcb.201502039_JCB_201502039_sm.pdf [file supp_jcb.201502039_JCB_201502039_sm.pdf]

Thomas et al., <http://www.jcb.org/cgi/content/full/jcb.201502039/DC1>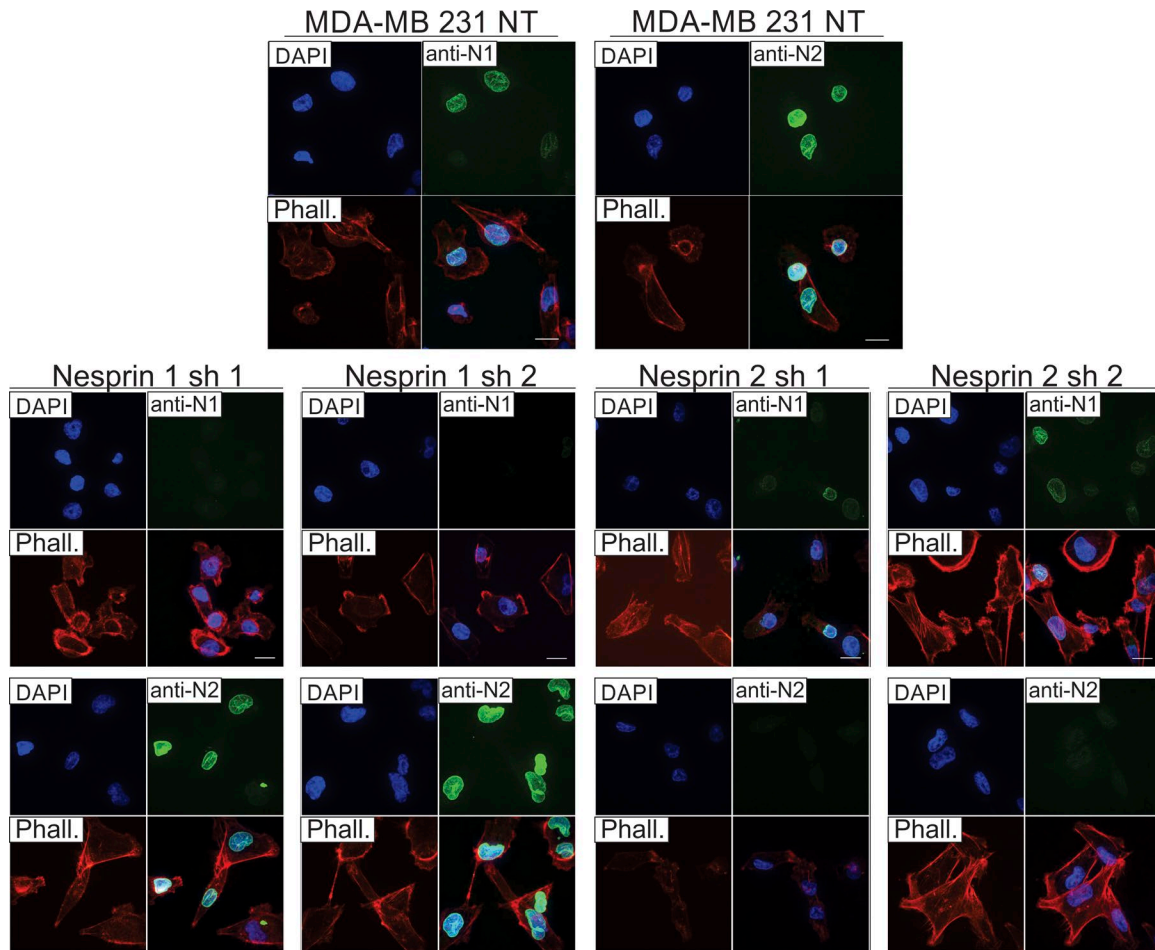

Figure S1. **Immunofluorescent imaging of nesprin isoform shRNA.** MDA-MB 231 cells were stably infected with lentivirus expressing shRNA constructs for nesprin-1 or -2, with two distinct shRNA sequences for each. Cells were stained using the mAbs MANNES1E or MANNES2G (MDA Monoclonal Antibody Resource) to label nesprin-1 or -2, respectively. Cells were colabeled with Alexa Fluor 568 Phalloidin (red) to visualize F-actin and DAPI (blue) to visualize nuclei. Bars, 20  $\mu$ m.

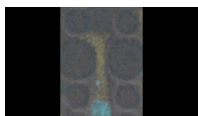

Video 1. **Time-lapse video of MDA-MB 231 cell migrating through a 5- $\mu$ m-wide pore of the 3D migration device.** MDA-MB 231 cells were infected with lentivirus for stable expression of histone 2B-CFP fusion to mark the nucleus (blue). The cells are also expressing YFP to label the cytoplasm (yellow). Images were analyzed using time-lapse spinning disk confocal microscopy (UltraView VOX laser system [PerkinElmer]; DM1 6100 base [Leica]; 63x oil/NA 1.47 at 37°C and 5% CO<sub>2</sub>). Images were acquired every 5 min. Length of time-lapse is ~3 h.

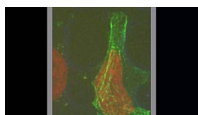

Video 2. **Formation of NMIIB stress fibers around nucleus.** MDA-MB 231 NMIIB shRNA cells were infected with lentivirus for stable expression of histone 2B-RFP fusion to mark the nucleus (red). The cells are also transiently transfected with NMIIB-GFP construct to label myosin IIB fibers (green). Images were analyzed using time-lapse spinning disk confocal microscopy (UltraView VOX laser system [Perkin-Elmer]; DM1 6100 base [Leica]; 63x oil/NA 1.47 at 37°C and 5% CO<sub>2</sub>). Images were acquired every 5 min. Length of time-lapse is ~4 h.
